# Supplementary material for: Genome-Scale Reconstruction of Escherichia coli's Transcriptional and Translational Machinery: A Knowledge Base, Its Mathematical Formulation, and Its Functional Characterization
Source: PLOS journal article supplement (doi:10.1371/journal.pcbi.1000312), 2009-03-12

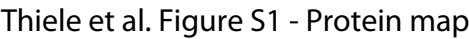

Supplement: S2 (10.1371/journal.pcbi.1000312.s002) [file journal.pcbi.1000312.s002]
